# Supplementary material
Source: PubMed Central journal article supplement (PMC10088279)
Supplement: mmc1.pdf [file mmc1.pdf]

# Supplementary materials

## **NETosis induction reflects COVID-19 severity and Long COVID: insights from a two-center patient cohort study in Israel**

Nitzan Krinsky<sup>1</sup>, Sofia Sizikov<sup>1</sup>, Sivan Nissim<sup>1</sup>, Adi Dror<sup>1</sup>, Anna Sas<sup>1</sup>, Hodaya Prinz<sup>1</sup>, Ester Pri-Or<sup>1</sup>, Shay Perek<sup>2</sup>, Ayelet Raz-Pasteur<sup>2</sup>, Izabella Lejbkowicz<sup>3</sup>, Sivan Ida Cohen-Matsliah<sup>3</sup>, Ronit Almog<sup>3</sup>, Nikanor Chen<sup>4</sup>, Ramzi Kurd<sup>4</sup>, Amir Jarjou'i<sup>4</sup>, Ariel Rokach<sup>4</sup>, Eli Ben-Chetrit<sup>4</sup>, Avi Schroeder<sup>5</sup>, Aleah F. Caulin<sup>6</sup>, Christian Con Yost<sup>7,8</sup>, Joshua D. Schiffman<sup>6,9\*</sup>, Mor Goldfeder<sup>1\*</sup>, Kimberly Martinod<sup>10\*</sup>

1. Peel Therapeutics Israel, Ltd, Nesher, Israel
2. Department of Internal Medicine A, Rambam Health Care Campus, The Rappaport Faculty of Medicine, Technion, Haifa, Israel.
3. Epidemiology Department and Biobank, Rambam Health Care Campus, Haifa, Israel.
4. Department of Internal Medicine, Shaare Zedek Medical Center, Faculty of Medicine, The Hebrew University of Jerusalem, Jerusalem, Israel
5. Laboratory for Targeted Drug Delivery and Personalized Medicine Technologies, Department of Chemical Engineering, Technion - Israel Institute of Technology, Haifa 32000, Israel
6. Peel Therapeutics, Inc, Salt Lake City, UT
7. Department of Pediatrics, University of Utah, Salt Lake City, UT
8. Molecular Medicine Program, University of Utah, Salt Lake City, UT
9. Division of Pediatric Hematology/Oncology, Department of Pediatrics, University of Utah, Salt Lake City, UT
10. Center for Molecular and Vascular Biology, Department of Cardiovascular Sciences, KU Leuven, Leuven, Belgium

\* Contributed equally as senior co-authors.

1 **Supplemental methods**

2 **ABO reverse grouping.** To determine blood type, plasma samples were tested  
3 against red cell reagents (Referencells®-4, IMMUCOR) and inspected visually  
4 for agglutination occurrence.

5

6 **Platelet activation marker and coagulation factor assays.** PF4 and soluble  
7 P-selectin (sP-selectin) plasma levels were measured using the Quantikine®  
8 ELISA Human CXCL4/PF4 and Quantikine® ELISA Human P-Selectin/CD62P  
9 Immunoassays (DPF40 and DPSE00, respectively, R&D Systems, Inc.). VWF  
10 and FVIII (total FVIII antigen) plasma levels were measured using ELISA kits  
11 per manufacturer protocol (ab108918 and ab272771, respectively, Abcam).  
12 Due to insufficient sample volumes, FVIII plasma levels could not be  
13 determined for 1 non-COVID subject,

14

15 **MPO antigen measurements.** MPO plasma levels were measured using the  
16 LEGEND MAX™ Human Myeloperoxidase ELISA Kit (440007, BioLegend  
17 Inc.). Due to insufficient volume, levels could not be determined for 6 subjects  
18 (3 COVID-19 subjects, 1 convalescent and 2 non-COVID).

19

20 **H3Cit-DNA ELISA.** H3Cit-DNA complex plasma levels were evaluated using a  
21 sandwich ELISA-based assay as previously described.<sup>26</sup> Immulon 4 HBX-well  
22 plates (3855, Thermo Scientific™) were coated with recombinant anti-histone  
23 H3 (citrulline R8) antibody (ab232939, Abcam), washed, and the plate blocked  
24 with 1% BSA in PBS. After washing, plasma and standard samples  
25 (H3Cit<sub>2,8,17</sub> dNuc nucleosomes (16-1362, EpiCypher®) were added to the  
26 plate together with peroxidase-conjugated anti-DNA antibody (from Cell Death  
27 Detection ELISA kit, 11544675001, Roche Diagnostics). The plate was  
28 incubated for 2 hours at room temperature with agitation at 80 rpm, washed  
29 and TMB One Component Microwell Substrate (0410-01L, Southern biotech™)  
30 used for ELISA development, with 1M HCl used to stop the reaction.  
31 Absorbance measurements at 450 nm with 620 nm reference wavelength were  
32 used to plot a calibration curve and calculate H3Cit-DNA complex levels. All  
33 samples from COVID-19 convalescent subjects were analyzed for H3Cit-DNA  
34 complex levels, except for 1 sample due to insufficient sample volume.

35

36 **Cell-free DNA (cfDNA) quantification.** Plasma samples were diluted in RPMI  
37 medium (01-100-1A, Biological Industries) supplemented with 0.5% 70°C heat-  
38 inactivated fetal bovine serum (04-127-1A, Biological Industries), 10 mM  
39 HEPES buffer (03-025-1C, Biological Industries) and 1 IU/ml of heparin  
40 (289973.01-IL, Teva Medical Marketing). Lambda DNA standard (from the  
41 Quant-iT™ Picogreen™ dsDNA Assay Kit, Invitrogen, P7589) was diluted  
42 similarly and used to calculate a standard curve. The diluted samples were  
43 mixed with 2 µM SYTOX Green dye (S7020, Invitrogen) in a 1:1 ratio. Then,  
44 fluorescence levels (excitation 488 nm, emission 530 nm) were measured and  
45 used to calculate values from the standard curve.

**Table S1:** Descriptive data of all study subjects and plasma samples.

| n                               | Shaare Zedek<br>Medical Center, n | Rambam Health<br>Care Campus, n | Total, n |
|---------------------------------|-----------------------------------|---------------------------------|----------|
| <b>Study subjects</b>           |                                   |                                 |          |
| <i>Total</i>                    | 152                               | 94                              | 246      |
| <i>Non-COVID</i>                | 10                                | 44                              | 54       |
| <i>Mild/moderate COVID-19</i>   | 37                                | 15                              | 52       |
| <i>Severe-critical COVID-19</i> | 39                                | 35                              | 74       |
| <i>Convalescent<sup>a</sup></i> | 66                                | -                               | 66       |

<sup>a</sup>16 of the convalescent patients also have a plasma sample that was taken during acute COVID-19.

**Table S2:** Adjusted P values from Dunn's multiple comparisons tests of clinical and demographic characteristic of study cohorts.

| Variable | Non-COVID-Mild/moderate | Non-COVID-Severe/critical | Non-COVID-Convalescents | Mild/moderate-Severe/critical | Mild/moderate-Convalescents | Severe/critical-Convalescents |
|----------|-------------------------|---------------------------|-------------------------|-------------------------------|-----------------------------|-------------------------------|
| Age      | >0.9999                 | <b>&lt;0.0001</b>         | 0.8661                  | <b>&lt;0.0001</b>             | >0.9999                     | <b>&lt;0.0001</b>             |
| BMI      | >0.9999                 | <b>0.0172</b>             | 0.9190                  | 0.1614                        | >0.9999                     | 0.8233                        |

**Table S3:** P values of multiple comparisons tests for platelet activation markers and coagulation factors, MPO-DNA and NETosis induction levels of study cohorts.

| Variable                            | Non-COVID-Mild/moderate* | Non-COVID-Severe/critical* | Non-COVID-Convalescents** | Mild/moderate-Severe/critical* | Mild/moderate-Convalescents* | Severe/critical-Convalescents* |
|-------------------------------------|--------------------------|----------------------------|---------------------------|--------------------------------|------------------------------|--------------------------------|
| VWF                                 | <b>0.0251</b>            | <b>0.0023</b>              | 0.9591                    | >0.9999                        | <b>0.0255</b>                | <b>0.0019</b>                  |
| FVIII                               | <b>0.0270</b>            | <b>&lt;0.0001</b>          | <b>0.0012</b>             | <b>&lt;0.0001</b>              | >0.9999                      | <b>&lt;0.0001</b>              |
| PF4                                 | <b>0.0023</b>            | <b>0.0001</b>              | 0.4934                    | >0.9999                        | <b>0.0001</b>                | <b>&lt;0.0001</b>              |
| P-selectin                          | >0.9999                  | <b>&lt;0.0001</b>          | 0.0862                    | <b>0.0041</b>                  | 0.0775                       | <b>&lt;0.0001</b>              |
| MPO                                 | <b>&lt;0.0001</b>        | <b>&lt;0.0001</b>          | 0.1869                    | 0.1211                         | <b>&lt;0.0001</b>            | <b>&lt;0.0001</b>              |
| cfDNA                               | <b>&lt;0.0001</b>        | <b>&lt;0.0001</b>          | >0.9999                   | 0.0645                         | <b>&lt;0.0001</b>            | <b>&lt;0.0001</b>              |
| MPO-DNA complexes                   | 0.7886                   | <b>0.0389</b>              | 0.2198                    | >0.9999                        | <b>0.0450</b>                | <b>0.0001</b>                  |
| NETosis induction level             | 0.1621                   | <b>&lt;0.0001</b>          | 0.4802                    | <b>0.0035</b>                  | 0.4546                       | <b>&lt;0.0001</b>              |
| MPO-DNA complexes UDL occurrence*** | 0.1178                   | 0.8145                     | <b>0.0437</b>             | <b>0.0497</b>                  | <b>0.0003</b>                | 0.0628                         |

\* Adjusted P values according to unpaired Kruskal-Wallis test and Dunn's multiple comparisons test for multiple comparisons.

\*\* P values according to two-tailed Mann-Whitney tests

\*\*\* P values according to Fisher's exact tests. Same values for analysis with first sample of sequential samples.

**Table S4:** Self-reported symptom list from Long COVID patients

| <b>Symptoms</b>                   | <b>Number of subjects experiencing the symptom</b> |
|-----------------------------------|----------------------------------------------------|
| Fatigue                           | 25                                                 |
| Dyspnea                           | 18                                                 |
| Chest pressure/pain               | 8                                                  |
| Cough                             | 7                                                  |
| Lung damage (chronic or acute)    | 8                                                  |
| Lost/changed sense of smell/taste | 5                                                  |
| Hair loss                         | 4                                                  |
| Difficulty concentrating          | 4                                                  |
| Muscle pain                       | 4                                                  |
| Hypoxemia                         | 3                                                  |
| Fast pulse                        | 3                                                  |
| Nausea                            | 2                                                  |
| Hypertension                      | 2                                                  |
| Joint pain                        | 2                                                  |
| Headache                          | 1                                                  |
| Facialis                          | 1                                                  |
| Sleeping difficulty               | 1                                                  |
| Shivering                         | 1                                                  |
| Hearing damage                    | 1                                                  |
| Pain during deep breathing        | 1                                                  |
| Burn in throat                    | 1                                                  |
| Neck pain                         | 1                                                  |
| Sleep apnea                       | 1                                                  |
| Heart damage                      | 1                                                  |

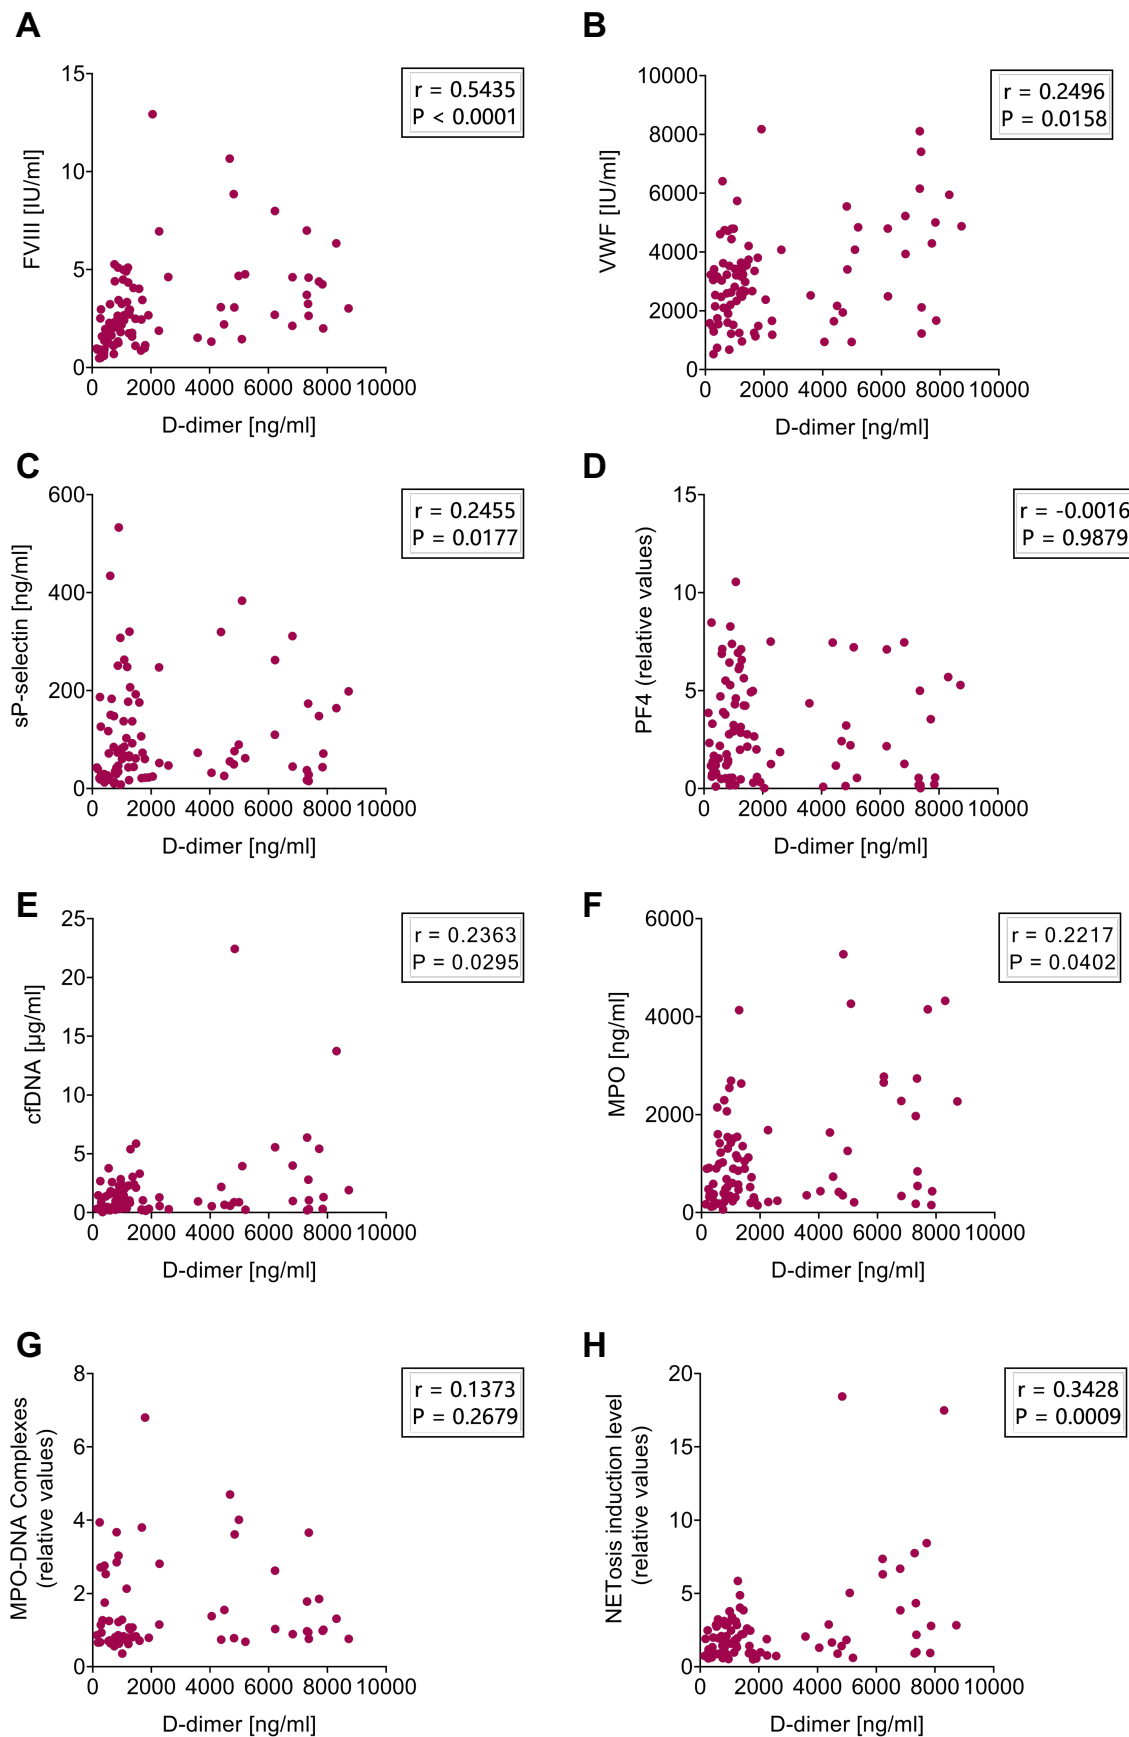

**Figure S1: Correlations between D-dimer levels and platelet activation, coagulation factors and NET-related measurements of COVID-19 patient cohorts. (A) FVIII (n=93), (B) VWF (n=93), (C) P-selectin (n=93), (D) PF4 (n=93), (E) cfDNA (n=85), (F) MPO (n=86), (G) MPO-DNA complex levels (n=67) and (H) NETosis induction (n=90). Statistical analysis was performed using the two-tailed Spearman correlation test.**

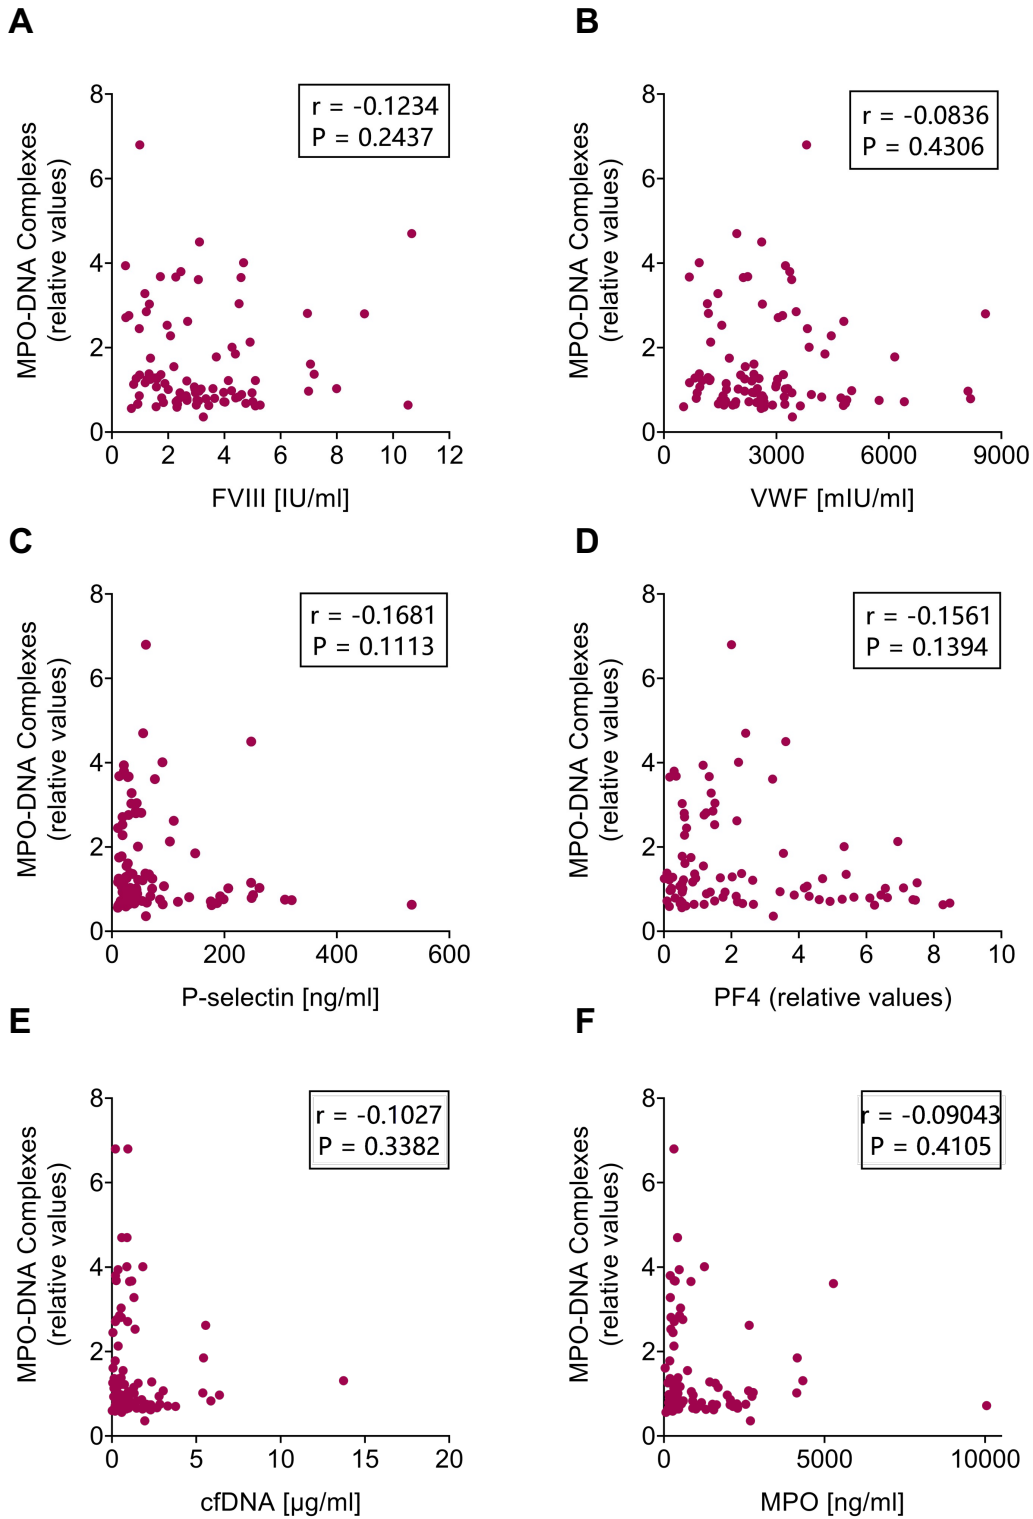

**Figure S2: Correlations between MPO-DNA complex levels and platelet activation and coagulation factors of COVID-19 patient cohorts. (A) FVIII (n=91), (B) VWF (n= 91), (C) P-selectin (n= 91), (D) PF4 (n= 91), (E) MPO (n=85) and (F) cfDNA (n=89). For subjects with sequential samples, the maximal value is presented. Statistical analysis was performed using the two-tailed Spearman correlation test.**



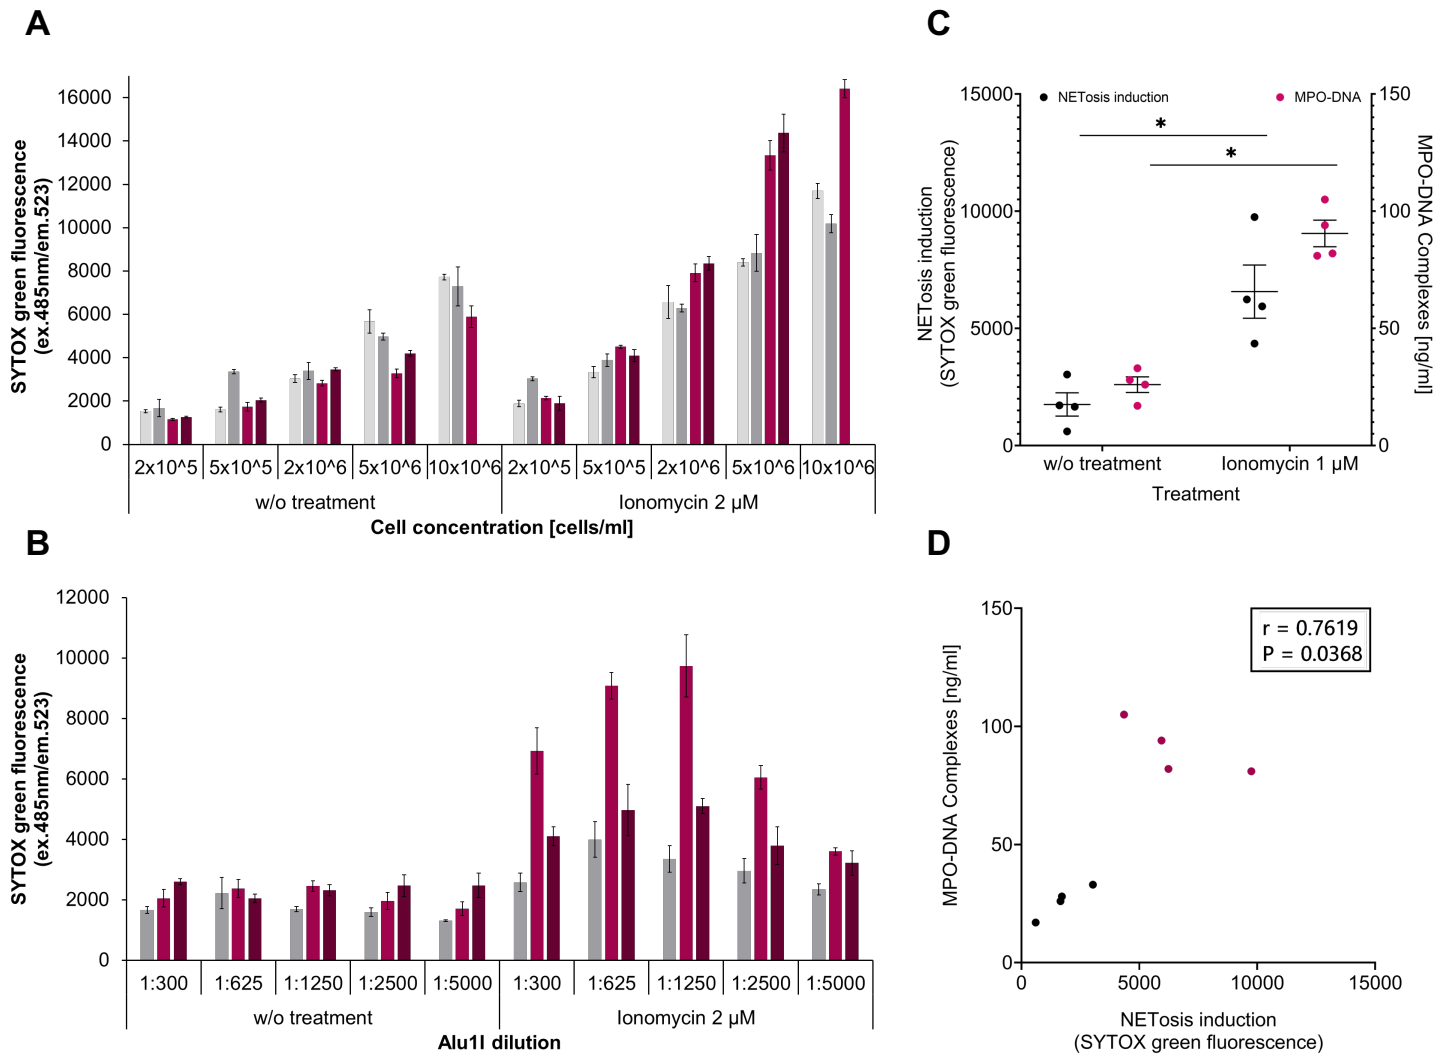

**Figure S3: Optimization of NETosis induction assay conditions.** NETosis induction was evaluated by incubating healthy neutrophils with and without 2  $\mu$ M ionomycin treatments for 1 hr. **(A)** Different cell numbers seeded per well were evaluated in 4 experimental repetitions represented by different colors. Concentration of  $2 \times 10^6$  cells/ml resulted in the highest sensitivity, when comparing induced to untreated cells, and was used in following assay. **(B)** Different Alu1 dilutions were evaluated in 3 experimental repetitions represented by different colors. **(C)&(D)** Parallel MPO-DNA level and NETosis induction evaluation (using SYTOX green fluorescence readouts on digested samples) of the same samples. Dilution of 1:1250 resulted in the highest sensitivity, when comparing induced to untreated cells, and was used in following assay. **(C)** Significant induction was demonstrated by both quantification methods according to two-tailed Mann–Whitney tests with  $n=4$  per group: MPO-DNA  $P = 0.0286$  and NETosis induction  $P = 0.0286$ . **(D)** A significant positive correlation was found between MPO-DNA and NETosis induction in the assay samples. Statistical analysis was performed using by calculating the two-tailed Spearman correlation coefficient.

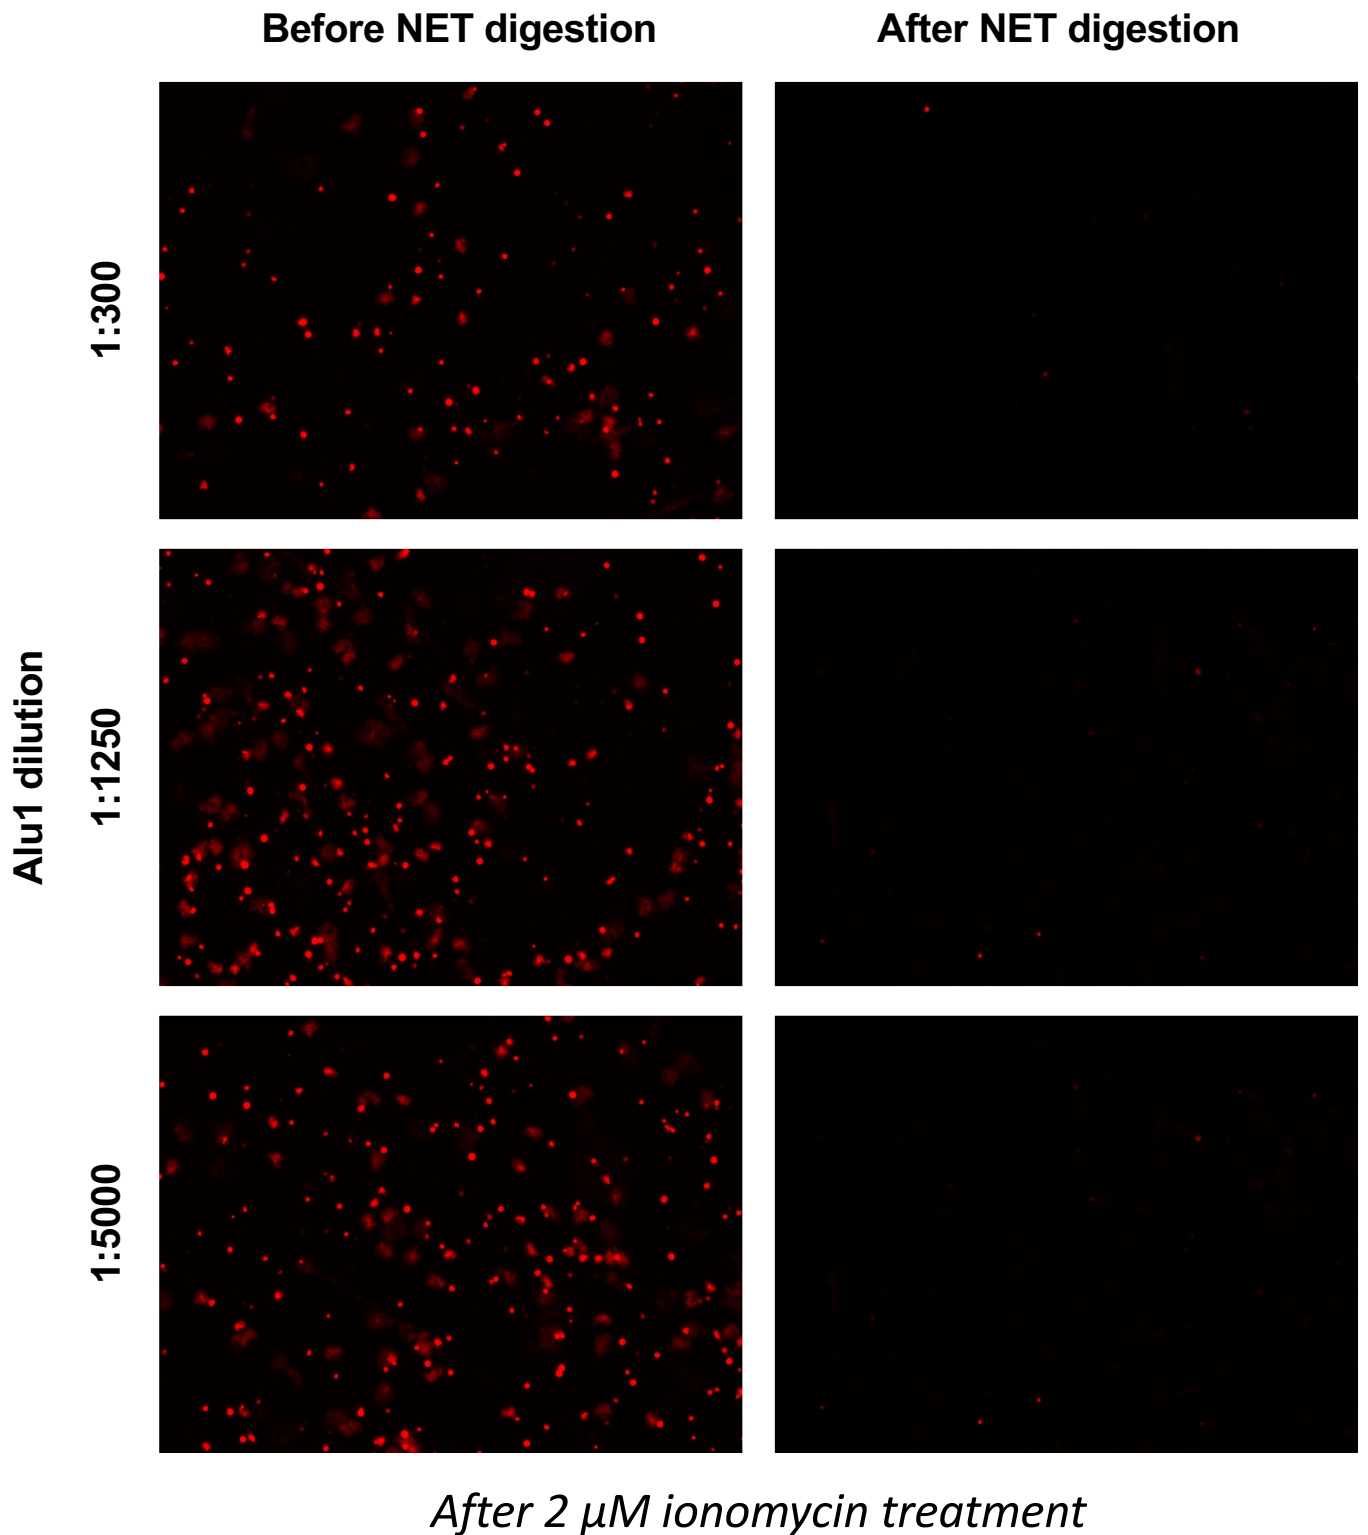

**Figure S4: Confirmation of NET digestion using fluorescence microscopy imaging.** NETosis induction in neutrophils ( $2 \times 10^5$  cells/well) was visualized with and without 2  $\mu$ M ionomycin treatments in the presence of 0.2  $\mu$ M of SYTOX orange. After a 1-hr incubation, wells were imaged, and then treated with different concentration of AluI to digest NETs into fragments that are released into supernatants. After a 20-minute incubation, wells contents were removed, and wells were visualized to check for residual SYTOX signal. Analysis was performed using EVOS M5000 imaging system (Thermo Fisher Scientific), 20X magnification with RFP filter.

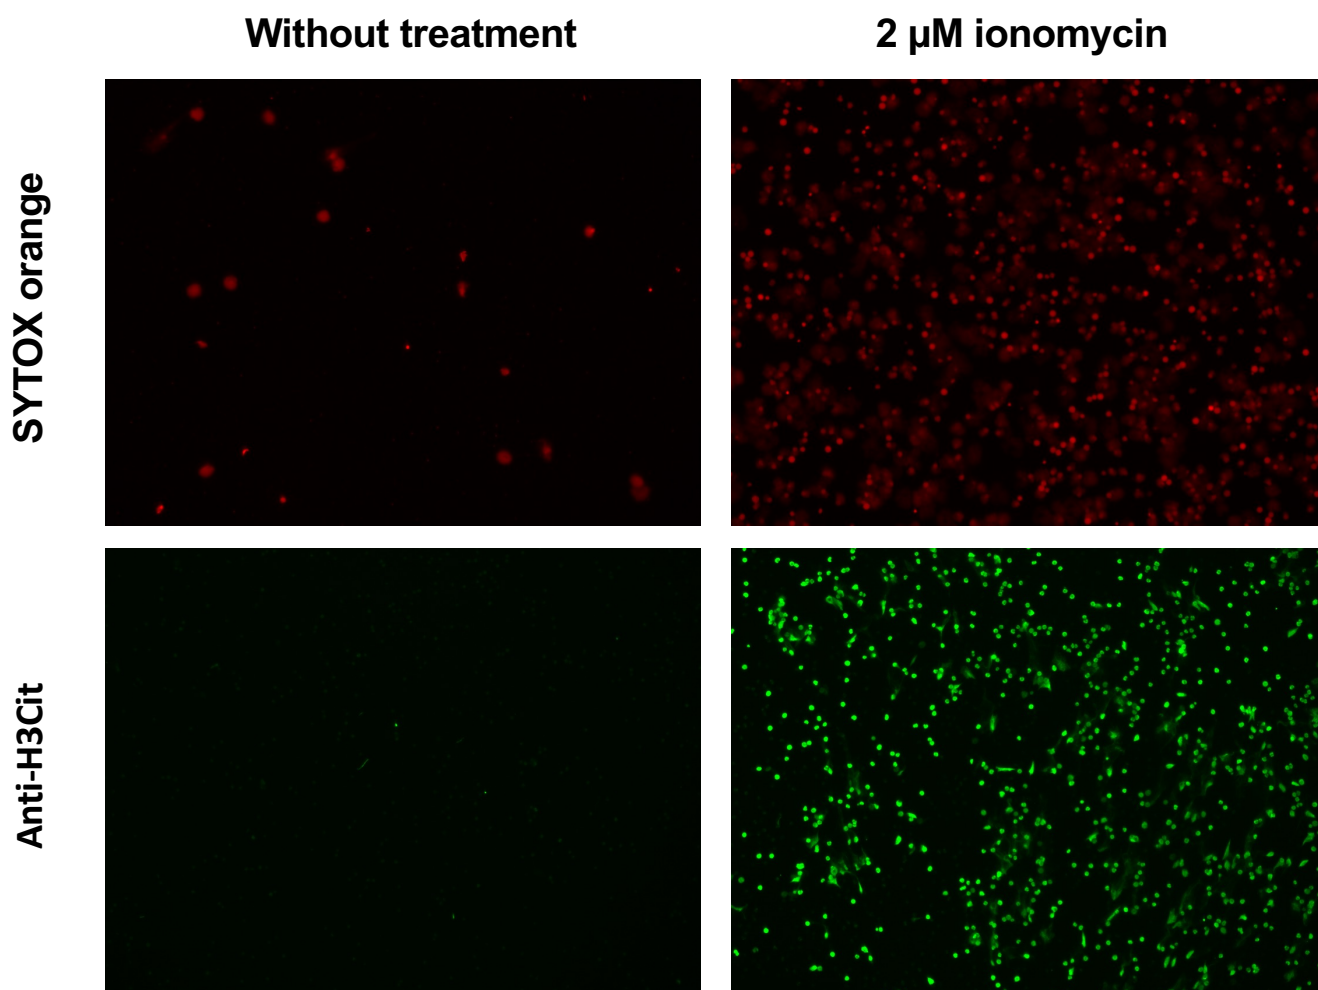

**Figure S5: Validation of SYTOX signal with NET-specific immunostaining for citrullinated histones.** NETosis induction was confirmed by SYTOX orange staining of neutrophils ( $1.9 \times 10^5$  cells/well) 1 hr after incubation with agonists (red signal). In addition, cells were fixed using 2% PFA and immunofluorescent staining was performed with anti-Histone H3 (citrulline R2 + R8 + R17) (H3Cit) as primary antibody and donkey anti-rabbit IgG (H+L) AF488 (green signal) as secondary antibody. Analysis was performed using the EVOS M5000 imaging system (ThermoFisher Scientific), 20X magnification with RFP and GFP filters.

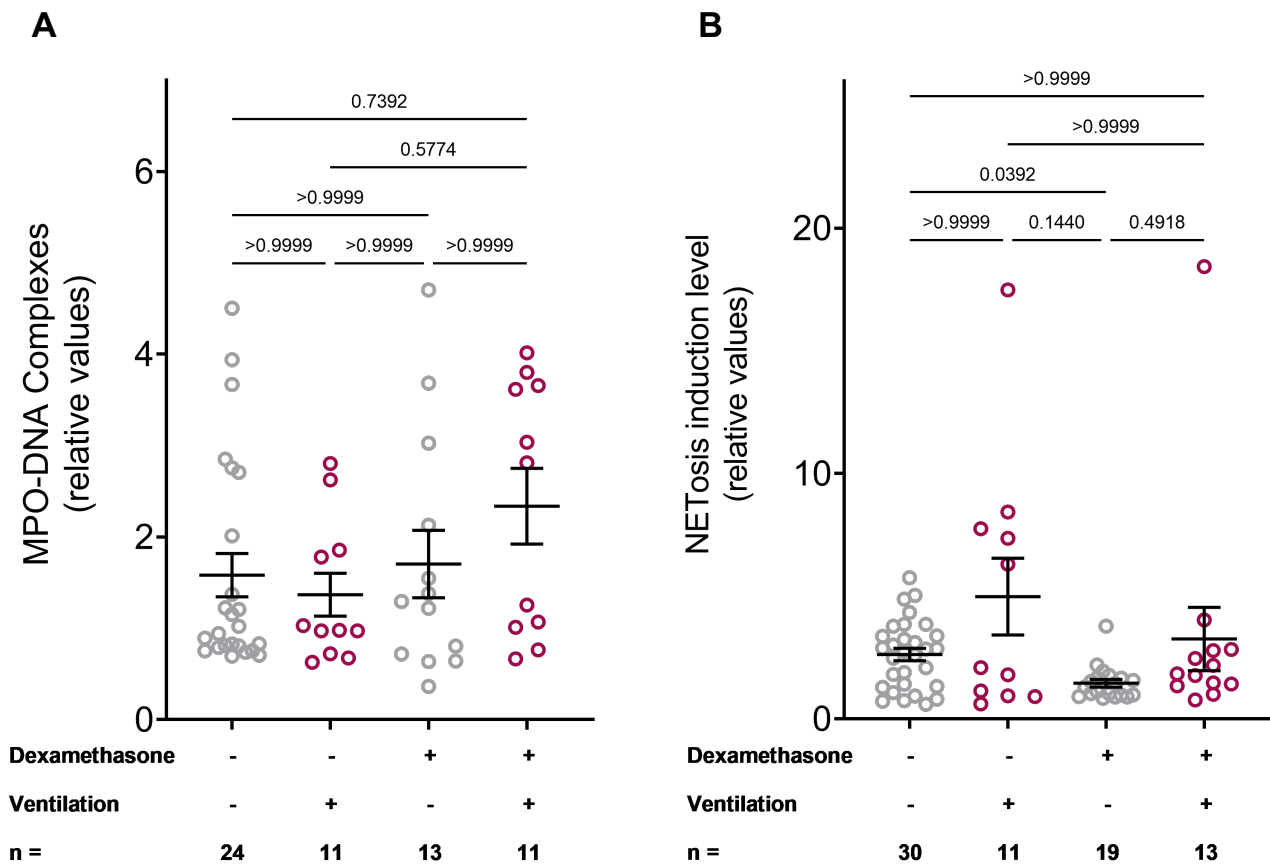

**Figure S6: Subgroup analysis of severe/critical COVID-19 subjects with or without dexamethasone treatment or ventilation. (A) MPO-DNA complex levels (B) NETosis induction levels.** MPO-DNA levels for 12 severe/critical COVID-19 subjects were under detection limits and are not presented in the graph. Due to limited sample volume NETosis induction levels could not be generated for one subject, and MPO-DNA levels could not be generated for 3 subjects. Statistical analysis was performed using Kruskal-Wallis test and Dunn's multiple comparisons tests of severe/critical COVID-19 subjects according to dexamethasone treatment and ventilation.

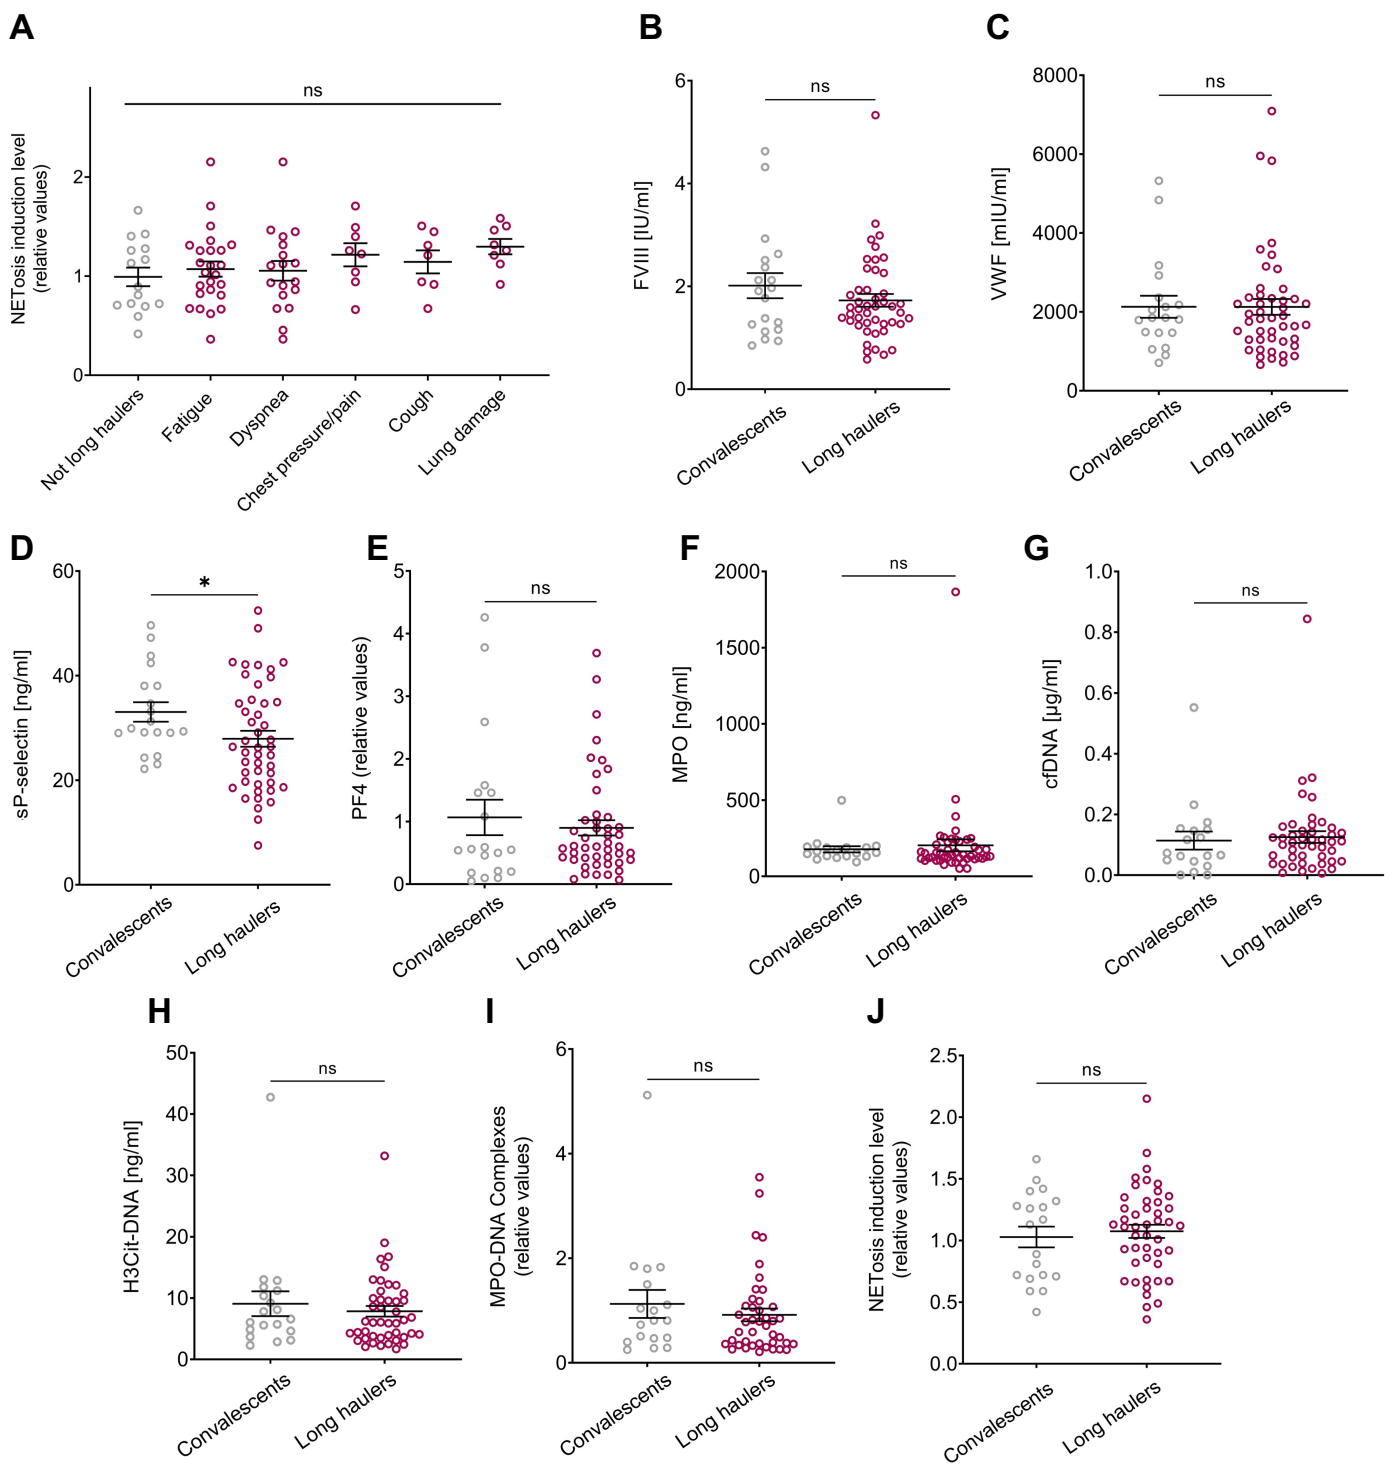

**Figure S7: Platelet activation, coagulation factors and MPO-DNA complex levels in convalescent and Long COVID patient plasma.** (A) NETosis induction levels of fully recovered subjects (n=15) and long haulers experienced the most common symptoms: fatigue (n=25), shortness of breath (n=18), chest pressure/pain (n=8), cough (n=7) and lung damage (n=8). No significant differences were found between the presented groups according to Kruskal-Wallis test ( $P = 0.2530$ ). Comparisons between long haulers and all other convalescents were analyzed for (B) FVIII, convalescents n=19, long haulers n=46,  $P = 0.4288$ , (C) VWF, convalescents n=19, long haulers n=46,  $P = 0.9345$ , (D) sP-selectin, convalescents n=19, long haulers n=46,  $P = 0.0416$ , (E) PF4, convalescents n=19, long haulers n=46,  $P = 0.7776$ , (F) MPO convalescents n=18, long haulers n=46,  $P = 0.4213$ , (G) cfDNA convalescents n=18, long haulers n=46,  $P = 0.5812$ , (H) H3Cit-DNA, convalescents n=19, long haulers n=45,  $P = 0.5976$ , (I) MPO-DNA complex levels, convalescents n=18, long haulers n=42,  $P = 0.8666$  and (J) NETosis induction level convalescents n=20, long haulers n=45,  $P = 0.9410$ . Statistical analysis was performed using Mann-Whitney tests.
